# Supplementary material for: Transcriptome analysis of tomato (Solanum lycopersicum L.) shoots reveals a crosstalk between auxin and strigolactone
Source: PLoS One. 2018 Jul 25;13(7):e0201124. doi: 10.1371/journal.pone.0201124 (PMC6059464; doi:10.1371/journal.pone.0201124)
Supplement: S1 Table — (XLSX) [file pone.0201124.s001.xlsx]

## Sheet: Sheet1
Table S1 The primer sequences of the PCR vertification.
Solyc08g082630.2-U	TCCTCAAGGCCACATGGAAC
Solyc08g082630.2-L	TGTATCGGAGGCTGTCAGGA
Solyc01g097290.2-U	GATCCTGCTAAGCCACCAGC
Solyc01g097290.2-L	GTATGGTGCACCGTCAACAC
Solyc01g096070.2-U	ACGTTCAGTTACTGGCGGAG
Solyc01g096070.2-L	CGCCTGAGTCATGTCCAGTT
Solyc05g008060.2-U	AGCCATTCCGCAAATAGGGG
Solyc05g008060.2-L	TGGGGTGTAGCTCCGATGTA
Solyc03g031970.2-U	GAACTATGGCATGCTTGTGCT
Solyc03g031970.2-L	ACAGATCAACTGTGGTGGCA
Solyc11g069500.1-U	GATTCACAGCTATGGCACGC
Solyc11g069500.1-L	TCCCAACTGGGACAACCCTA
Solyc04g007690.2-U	CGTTTCTCAAGATTTTGGTGGTG
Solyc04g007690.2-L	CCGGAATCTTGAACTCCGGT
Solyc03g118740.2-U	CCTGGAAAAGTTGAGGGGCA
Solyc03g118740.2-L	CCAAGTGAGGCCAAACAAGC
Solyc12g005310.1-U	GTCCCAGATTTGGAGACGGG
Solyc12g005310.1-L	GGCTGAGTCCACAGAGCATT
Solyc08g075490.2-U	AGTGTTGATCGCGCCGAATA
Solyc08g075490.2-L	CATAGGACCCCCAATGGCTG
Solyc11g072040.1-U	GCGACCATCATGTACCCCAA
Solyc11g072040.1-L	TGGGTGAAACGTAGGCCATC
Solyc10g008720.2-U	GCCCCTAGGATGCTCAACAG
Solyc10g008720.2-L	TGGCAGCATTGTAGTGGTCA
Solyc05g053530.1-U	CAGGAAGTGATGAGCCTTTGA
Solyc05g053530.1-L	GCCATGAAGGTGTACCGAGT
Solyc02g081330.2-U	ACCGGGGTTTGGAATCATCC
Solyc02g081330.2-L	CAGCTGGACTAGCCACCAAA
Solyc11g006250.1-U	AACCCCCAGCTTACGCAAAT
Solyc11g006250.1-L	GGTCCTTGTCCACAACATGC
Solyc11g071620.1-U	GCTGAAAATGCCATAGCGGG
Solyc11g071620.1-L	AGTCCAAATTCGTGGCGGAT
Solyc02g071700.2-U	AGTTGAAGGTGCACCGGAAG
Solyc02g071700.2-L	TTGCGCTTGCAAAAGATGGT
Solyc11g031960.1-U	CTTGACTTCCCCCAAGGAGC
Solyc11g031960.1-L	ATTCCTGCTGCTCCTGATGC
Solyc04g050570.2-U	TCGTGCAGATTCACCACCTT
Solyc04g050570.2-L	AGCTTTCCCCCTTGAAGCTC
Solyc07g049440.2-U	GCAAACGCGAAAATTCCAGC
Solyc07g049440.2-L	AAACCAGCTGCCTCCGAAAT
