# Supplementary material for: Transcriptome analysis of tomato (Solanum lycopersicum L.) shoots reveals a crosstalk between auxin and strigolactone
Source: PLoS One. 2018 Jul 25;13(7):e0201124. doi: 10.1371/journal.pone.0201124 (PMC6059464; doi:10.1371/journal.pone.0201124)
Supplement: S2 Table — (XLSX) [file pone.0201124.s002.xlsx]

## Sheet: Sheet1
Table S2 Summary of sequencing results of tomato samples under different treatments.
Samples	Read_length	Raw_reads	Clean_reads	Clean_bases	Raw_GC	Clean_GC	Raw_Q20	Clean_Q20	Raw_Q30	Clean_Q30	Adapter
CK_1	150 bp	47485522	47451046	7117656900	0.4309	0.4309	0.9762	0.9762	0.9414	0.9415	0.0007
CK_2	150 bp	42608946	42582446	6387366900	0.4335	0.4334	0.9762	0.9762	0.9413	0.9413	0.0006
CK_3	150 bp	47485400	47451370	7117705500	0.4319	0.4319	0.9766	0.9766	0.9422	0.9423	0.0006
IAA_1	150 bp	47485058	47446328	7116949200	0.4302	0.4302	0.9759	0.9759	0.9406	0.9406	0.0007
IAA_2	150 bp	47465932	47436476	7115471400	0.4312	0.4312	0.9735	0.9735	0.9366	0.9366	0.0006
IAA_3	150 bp	47456814	47423018	7113452700	0.4282	0.4282	0.9738	0.9738	0.9372	0.9373	0.0006
GR24_1	150 bp	47485612	47447226	7117083900	0.4295	0.4295	0.9781	0.9781	0.9453	0.9453	0.0007
GR24_2	150 bp	47438226	47395402	7109310300	0.4334	0.4334	0.971	0.9711	0.9321	0.9322	0.0008
GR24_3	150 bp	47484108	47440886	7116132900	0.4421	0.442	0.9775	0.9775	0.9436	0.9437	0.0008
IAA+GR24_1	150 bp	47432142	47396688	7109503200	0.4314	0.4314	0.9695	0.9695	0.9294	0.9294	0.0006
IAA+GR24_2	150 bp	47485110	47448178	7117226700	0.428	0.428	0.9773	0.9773	0.9436	0.9438	0.0007
IAA+GR24_3	150 bp	47462696	47427026	7114053900	0.4318	0.4318	0.9741	0.9741	0.9379	0.938	0.0007
