# Supplementary material for: Transcriptome analysis of tomato (Solanum lycopersicum L.) shoots reveals a crosstalk between auxin and strigolactone
Source: PLoS One. 2018 Jul 25;13(7):e0201124. doi: 10.1371/journal.pone.0201124 (PMC6059464; doi:10.1371/journal.pone.0201124)
Supplement: S3 Table — (XLSX) [file pone.0201124.s003.xlsx]

## Sheet: Sheet1
Table S3 Alignment distribution of the unique mapped reads.
Regions(%)	CK_1	CK_2	CK_3	IAA_1	IAA_2	IAA_3	GR24_1	GR24_2	GR24_3	IAA+GR24_1	IAA+GR24_2	IAA+GR24_3
exon	89.4	87.89	88.93	88.92	88.89	88	88.7	88.69	87.52	88.97	88.38	88.34
intronic	3.5	3.84	3.26	3.2	3.56	3.97	3.48	3.55	3.45	3.26	3.89	4.08
intergenic	7.1	8.28	7.81	7.88	7.55	8.03	7.82	7.76	9.03	7.77	7.72	7.58
