# Supplementary material for: Transcriptome analysis of tomato (Solanum lycopersicum L.) shoots reveals a crosstalk between auxin and strigolactone
Source: PLoS One. 2018 Jul 25;13(7):e0201124. doi: 10.1371/journal.pone.0201124 (PMC6059464; doi:10.1371/journal.pone.0201124)
Supplement: S4 Table — (XLSX) [file pone.0201124.s004.xlsx]

## Sheet: Sheet1
Table S4 The significant values of each KEGG pathway under different treatments
#Pathway	IAA treatment	GR treatment	IAA+GR treatment
Plant hormone signal transduction	5.23457e-11	0.0059816	6.56646e-12
Photosynthesis - antenna proteins	8.82773e-12	6.38765e-07	1.01113e-09
Biosynthesis of secondary metabolites	0.000156013	0.000910182	0.000156013
Stilbenoid, diarylheptanoid and gingerol biosynthesis	6.042e-05	0.0745289	0.00151561
Phenylpropanoid biosynthesis	0.000195328	1	0.00155487
Arginine and proline metabolism	0.00160893	0.000522985	0.0022147
Cysteine and methionine metabolism	0.000654375	0.0059135	0.0028758
Metabolic pathways	0.0239358	0.0651809	0.00361877
Starch and sucrose metabolism	1.66967e-05	1	0.00500743
Circadian rhythm - plant	1.45005e-05	0.00122821	0.00675743
Phenylalanine metabolism	0.00209603	1	0.00975165
Alanine, aspartate and glutamate metabolism	0.067391	1	0.0106286
Carotenoid biosynthesis	0.00577894	1	0.0116214
Limonene and pinene degradation	0.00200543	1	0.0164604
Valine, leucine and isoleucine degradation	1	1	0.0196938
Diterpenoid biosynthesis	0.00965895	0.000384474	0.0240938
alpha-Linolenic acid metabolism	0.00860619	0.00469631	0.0250782
Linoleic acid metabolism	0.0122934	0.0071197	0.0261842
Cutin, suberine and wax biosynthesis	0.000820189	0.000811708	0.0265016
Amino sugar and nucleotide sugar metabolism	1	0.0355596	0.0372135
Protein processing in endoplasmic reticulum	1	1	0.0392349
Brassinosteroid biosynthesis	0.0589251	1	0.0412955
Histidine metabolism	1	1	0.0486107
Glycine, serine and threonine metabolism	1	1	0.0510912
Plant-pathogen interaction	0.0482043	1	0.0670599
Ascorbate and aldarate metabolism	0.0903959	1	0.072686
Regulation of autophagy	1	1	0.0773479
ABC transporters	0.0390954	1	0.0982158
Pentose phosphate pathway	1	0.029008	1
Carbon fixation in photosynthetic organisms	1	0.066053	1
Glycolysis/Gluconeogenesis	1	0.0782655	1
Glutathione metabolism	0.00276889	1	1
Taurine and hypotaurine metabolism	0.00319257	1	1
Flavone and flavonol biosynthesis	0.0140042	1	1
Other glycan degradation	0.0217049	1	1
Cyanoamino acid metabolism	0.021766	1	1
Ubiquinone and other terpenoid-quinone biosynthesis	0.031577	1	1
Steroid biosynthesis	0.031577	1	1
Sphingolipid metabolism	0.0372677	1	1
Arachidonic acid metabolism	0.0845417	1	1
Zeatin biosynthesis	0.0888851	1	1
Inositol phosphate metabolism	1	1	1
Nitrogen metabolism	1	1	1
Flavonoid biosynthesis	1	1	1
